# Supplementary material
Source: Springer Nature journal article supplement (https://www.springermedizin.de/resource/supplementary/12885_2013_3941_MOESM2_ESM.pdf/9464854)

Control

Rapamycin-treated

CD31

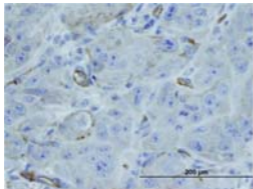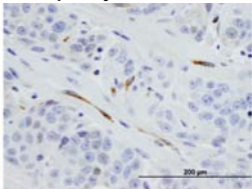

CD31

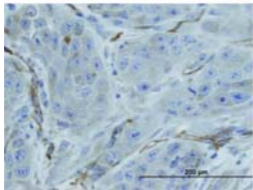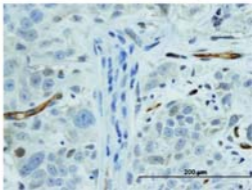

Supplement: MOESM2 [file 9464854]
